# Supplementary material for: Implications of COVID-19: The Effect of Working From Home on Financial and Mental Well-Being in the UK
Source: PubMed Central journal article supplement (PMC9808217; doi:10.34172/ijhpm.2021.33), 2021-04-21

**Article title:** Implications of COVID-19: The Effect of Working From Home on Financial and Mental Well-Being in the UK

**Journal name:** International Journal of Health Policy and Management (IJHPM)

**Authors' information:** Eleftherios Giovanis<sup>1\*</sup>, Oznur Ozdamar<sup>2</sup>

<sup>1</sup>Department of Public Finance, Nazilli Faculty of Economics and Administrative Sciences, Aydın Adnan Menderes University, Aydın, Turkey.

<sup>2</sup>Department of Economics, Faculty of Economics and Administrative Sciences, Izmir University Bakırcay, Izmir, Turkey.

(\*corresponding author: [egiovanis@adu.edu.tr](mailto:egiovanis@adu.edu.tr))

### Supplementary file 1

**Figure S1.** GHQ-12 Caseness by working always from home

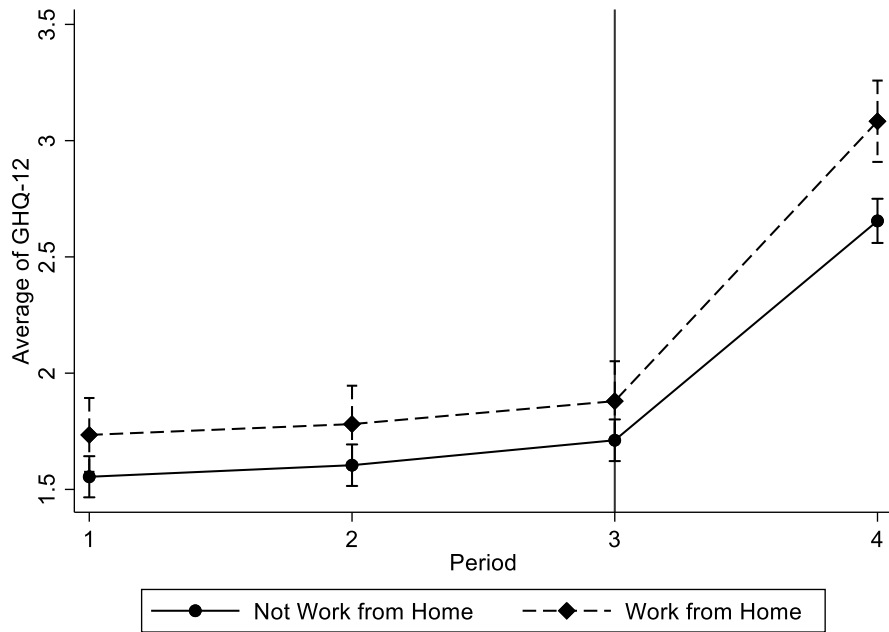

**Figure S2.** Perception about the future financial situation by working from home on occasion

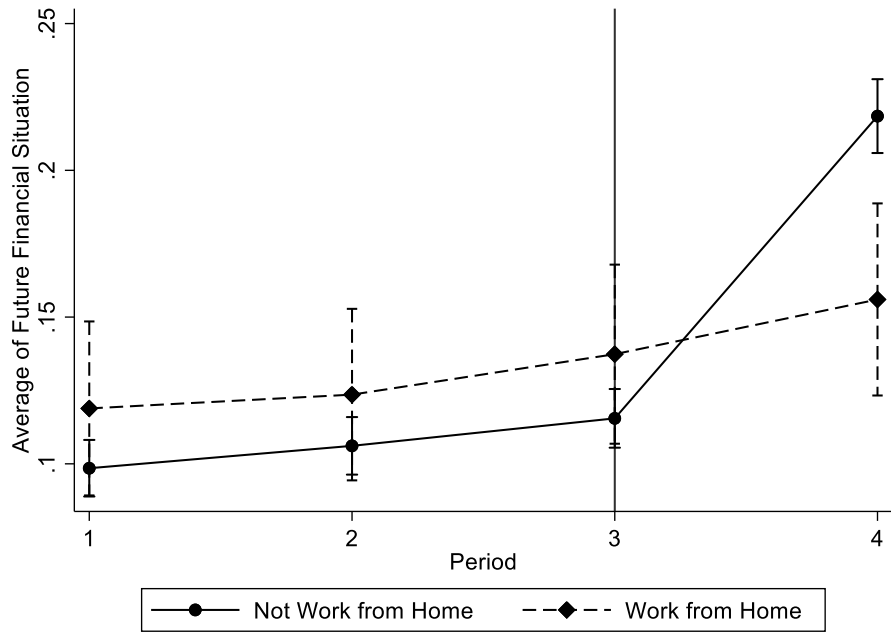

**Figure S3.** GHQ-12 Caseness by working from home on occasion

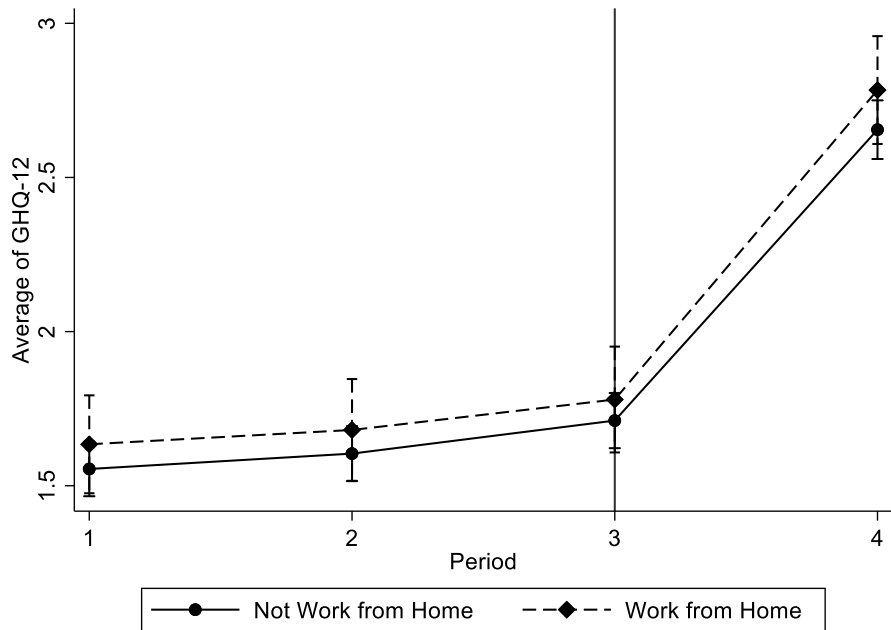

Supplement: ijhpm-11-1635-s001.pdf [file ijhpm-11-1635-s001.pdf]
